# Supplementary material for: Nickel as a modifier of calcium oxalate: an in situ liquid cell TEM investigation of nucleation and growth
Source: Royal Society of Chemistry journal article supplement (doi:10.1039/d3nr05314h), 2024-01-01
Supplement: d3nr05314h1.pdf [file d3nr05314h1.pdf]

## Supporting Information

### Nickel as a Modifier of Calcium Oxalate: An In-Situ Liquid Cell TEM Investigation of Nucleation and Growth

Lioudmila V. Sorokina,<sup>a</sup> Abhijit H. Phakatkar,<sup>b</sup> Pavel Rehak,<sup>c</sup> Petr Král,<sup>d</sup> Tolou Shokuhfar,<sup>b,e</sup> Reza Shahbazian – Yassar,<sup>\*a,e</sup>

<sup>a</sup>Department of Civil, Materials, and Environmental Engineering, University of Illinois Chicago, Chicago, IL 60607, USA.

<sup>b</sup>Department of Biomedical Engineering, University of Illinois Chicago, Chicago, IL, 60607, USA.

<sup>c</sup> Department of Chemistry, University of Illinois Chicago, Chicago, IL, 60607, USA.

<sup>d</sup>Departments of Chemistry, Physics, Pharmaceutical Sciences, and Chemical Engineering, University of Illinois Chicago, Chicago, IL, 60607, USA.

<sup>e</sup>Department of Mechanical and Industrial Engineering, University of Illinois Chicago, Chicago, IL, 60607, USA. Email: rsyassar@uic.edu

### Supplementary Video Captions:

**Video S1.** Growth of calcium oxalate trihydrate (COT) nanoparticle (NP) in presence of nickel ions.

**Video S2.** Atomistic molecular dynamics simulation of [CaOx] = 30 mM and [Ni] = 0 mM.

**Video S3.** Atomistic molecular dynamics simulation of [CaOx] = 30 mM and [Ni] = 4 mM.

### Supplementary Figures:

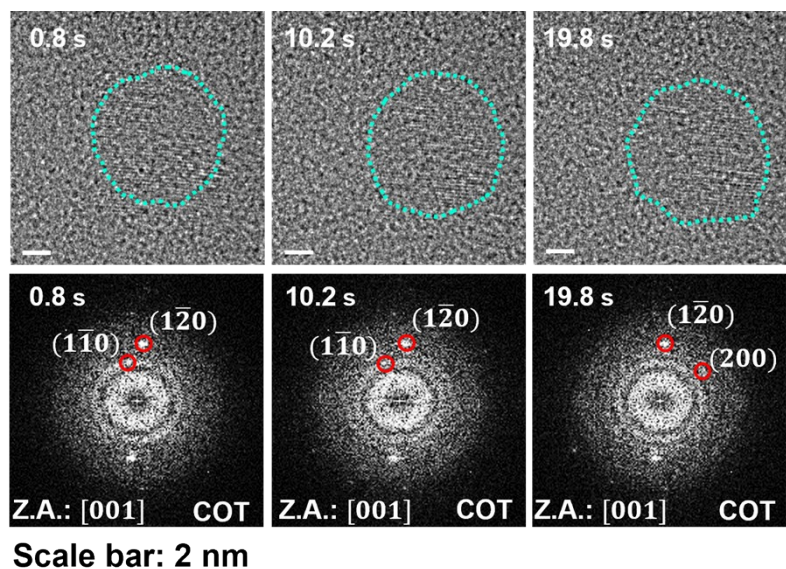

**Figure S1.** Time-lapse TEM micrographs and corresponding FFTs show no changes in phase and size of a COT nanoparticle acquired after 300 seconds of beam off.

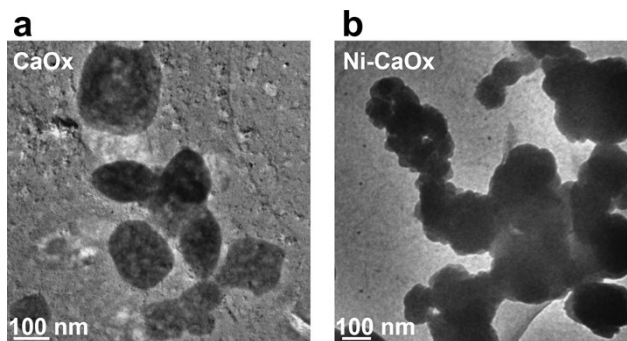

**Figure S2.** TEM micrographs of calcium oxalate nanoparticles formed in the absence (a) and presence (b) of nickel ions.

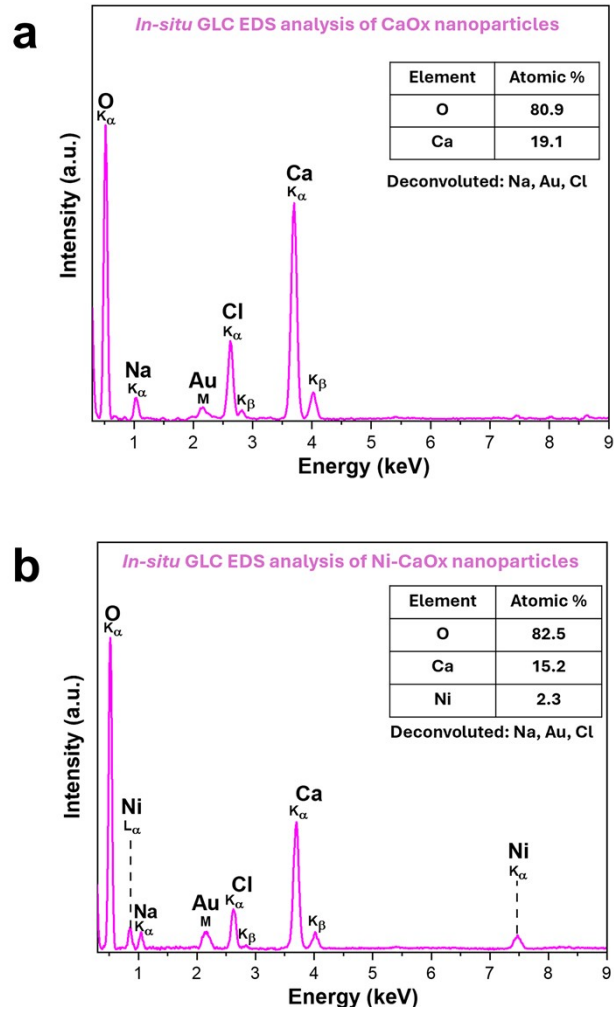

**Figure S3.** *In-situ* GLC EDS deconvoluted spectra of CaOx (a) and Ni-CaOx (b) nanoparticles. Deconvoluted elements include Au since the signal comes from Au grid and Na and Cl, which are spectator ions in the encapsulated solution.

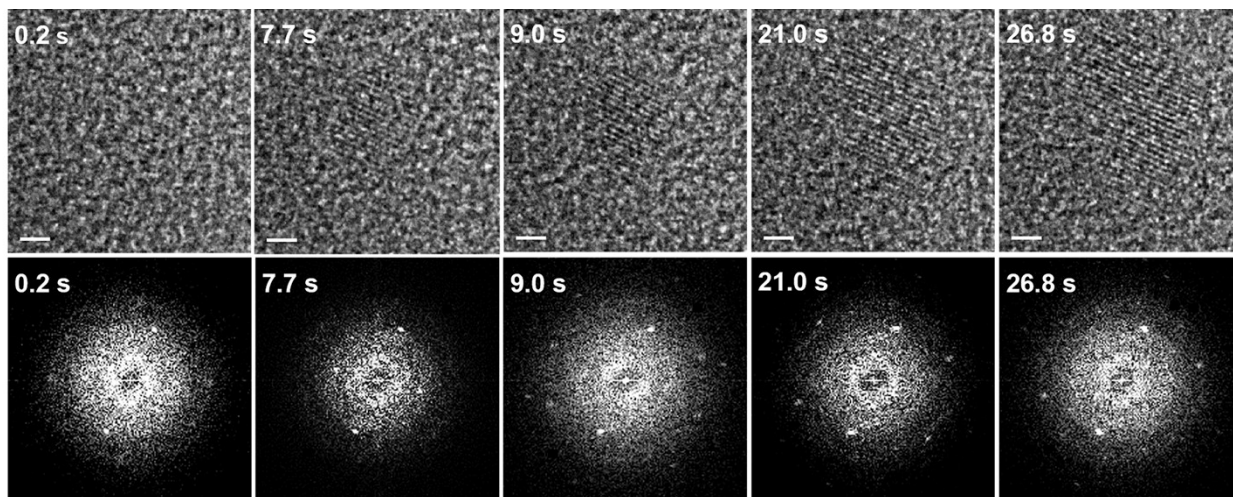

**Figure S4.** Time-lapse TEM micrographs and corresponding FFTs of a COT NP growing in the presence of  $\text{Ni}^{2+}$  ions. Scale bar: 2 nm.

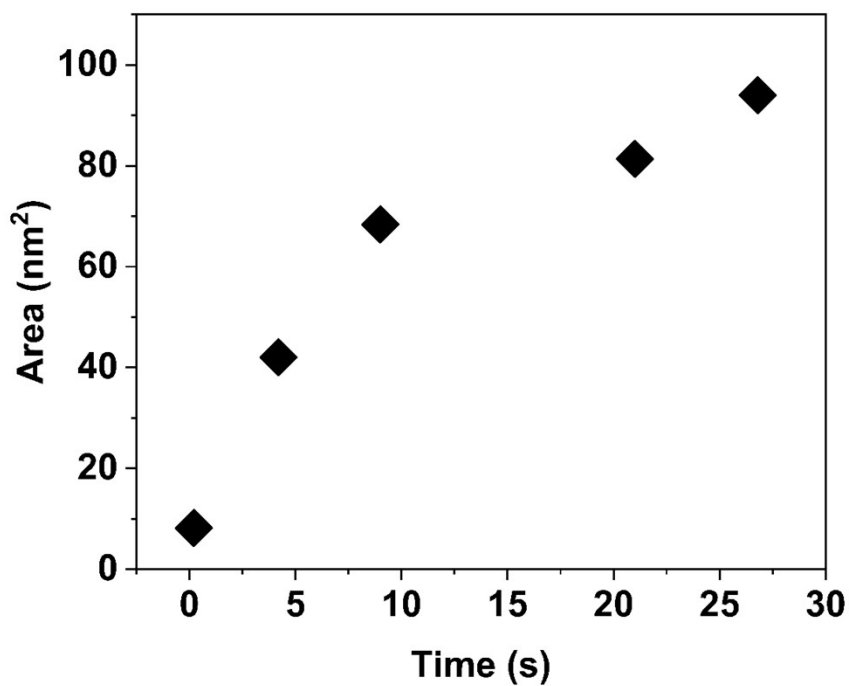

**Figure S5.** Change in area of a COT NP with  $\text{Ni}^{2+}$  over time.

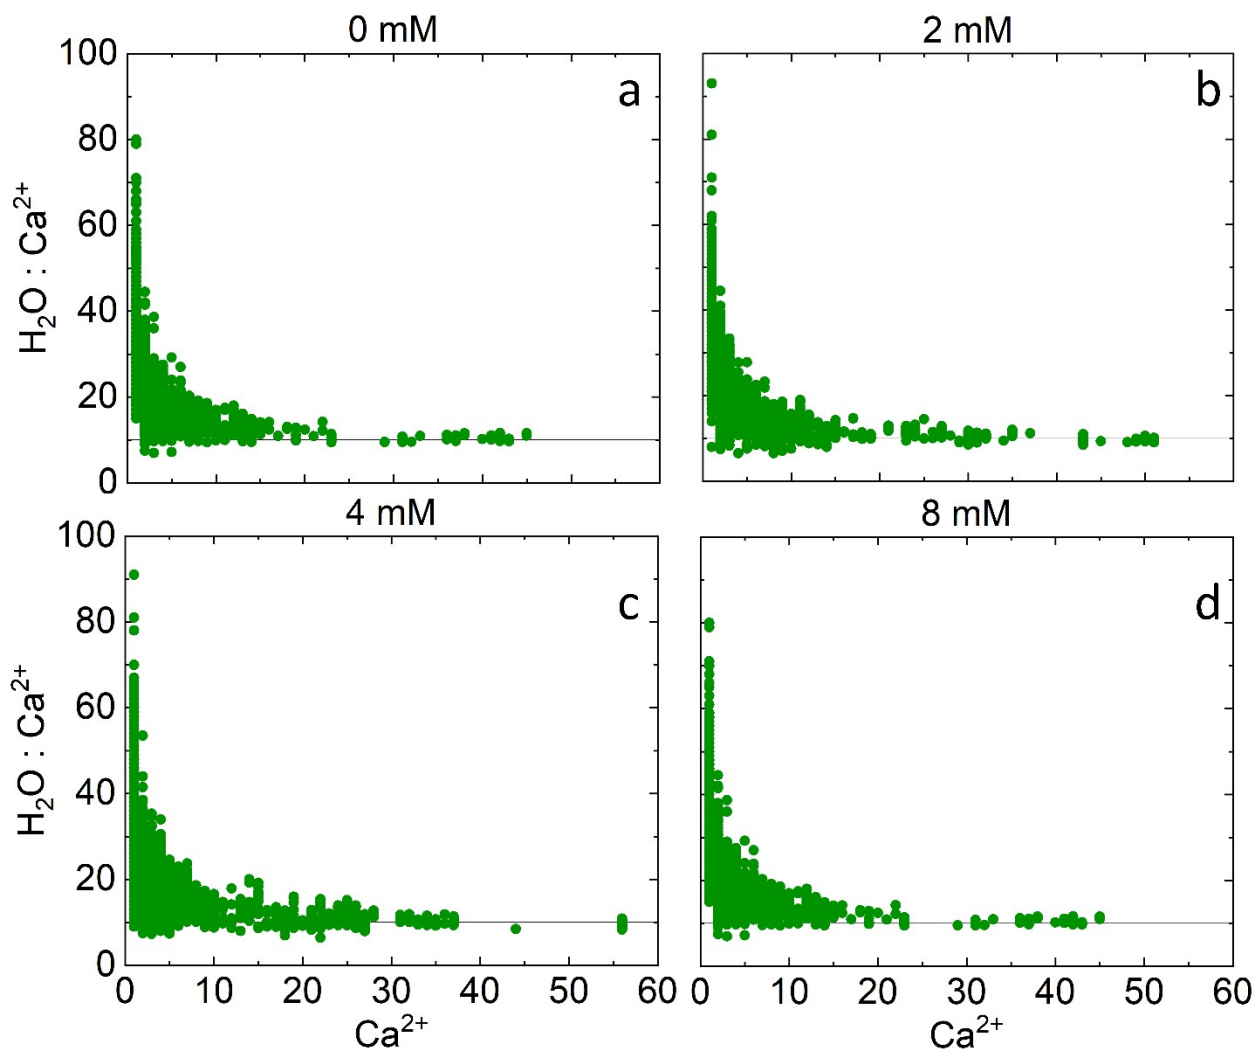

**Figure S6.** Number of water molecules within 4.5 Å per  $\text{Ca}^{2+}$  ion in a cluster vs. number of  $\text{Ca}^{2+}$  ion within a cluster at 0, 2, 4, and 8 mM concentrations.

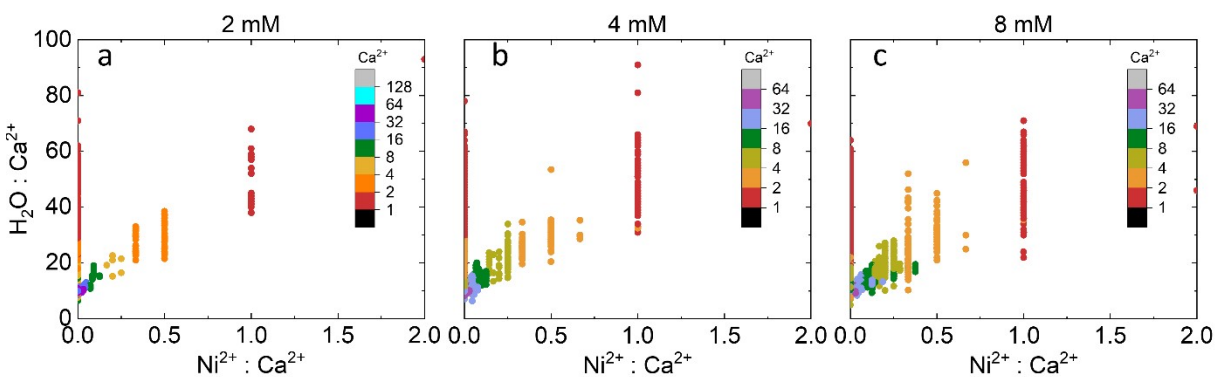

**Figure S7.** Number of water molecules within 4.5 Å per  $\text{Ca}^{2+}$  ion in a cluster vs. ratio of  $\text{Ni}^{2+}$  ions within 4.5 Å of a cluster with respect to number of  $\text{Ca}^{2+}$  ions in a cluster. Color scale shows the number of  $\text{Ca}^{2+}$  in cluster at 0, 2, 4, and 8 mM concentrations.

*Supersaturation of calcium oxalate:*

The degree of supersaturation in the control calcium oxalate sample was estimated using the following: <sup>1, 2</sup>

$$\sigma \approx \frac{c - c^{sat}}{c^{sat}} \quad (S1)$$
$$\sigma \approx \frac{0.03 M - 0.57 \times 10^{-4} M}{0.57 \times 10^{-4} M}$$
$$\sigma \approx 525$$

$\sigma$  - the supersaturation of the CaOx solution

$c$  - the concentration of the solute

$c^{sat}$  - solute solubility

1. J. M. Schall, G. Capellades and A. S. Myerson, *CrystEngComm*, 2019, **21**, 5811-5817.
2. I. Gutzow, S. Atanassova, G. Budevsky and K. Neykov, *Urological research*, 1993, **21**, 181-185.
